# Overexpression of the Wheat Aquaporin Gene, *TaAQP7*, Enhances Drought Tolerance in Transgenic Tobacco

Shiyi Zhou<sup>1</sup>, Wei Hu<sup>1</sup>, Xiaomin Deng, Zhanbing Ma, Lihong Chen, Chao Huang, Chen Wang, Jie Wang, Yanzhen He, Guangxiao Yang\*, Guangyuan He\*

Genetic Engineering International Cooperation Base of Chinese Ministry of Science and Technology, Chinese National Center of Plant Gene Research (Wuhan) HUST Part, Key Laboratory of Molecular Biophysics of Chinese Ministry of Education, College of Life Science and Technology, Huazhong University of Science and Technology (HUST), Wuhan, China

## Abstract

Aquaporin (AQP) proteins have been shown to transport water and other small molecules through biological membranes, which is crucial for plants to combat stress caused by drought. However, the precise role of AQPs in drought stress response is not completely understood in plants. In this study, a PIP2 subgroup gene AQP, designated as *TaAQP7*, was cloned and characterized from wheat. Expression of *TaAQP7*-GFP fusion protein revealed its localization in the plasma membrane. *TaAQP7* exhibited high water channel activity in *Xenopus laevis* oocytes and *TaAQP7* transcript was induced by dehydration, and treatments with polyethylene glycol (PEG), abscisic acid (ABA) and H<sub>2</sub>O<sub>2</sub>. Further, *TaAQP7* was upregulated after PEG treatment and was blocked by inhibitors of ABA biosynthesis, implying that ABA signaling was involved in the upregulation of *TaAQP7* after PEG treatment. Overexpression of *TaAQP7* increased drought tolerance in tobacco. The transgenic tobacco lines had lower levels of malondialdehyde (MDA) and H<sub>2</sub>O<sub>2</sub>, and less ion leakage (IL), but higher relative water content (RWC) and superoxide dismutase (SOD) and catalase (CAT) activities when compared with the wild type (WT) under drought stress. Taken together, our results show that *TaAQP7* confers drought stress tolerance in transgenic tobacco by increasing the ability to retain water, reduce ROS accumulation and membrane damage, and enhance the activities of antioxidants.

**Citation:** Zhou S, Hu W, Deng X, Ma Z, Chen L, et al. (2012) Overexpression of the Wheat Aquaporin Gene, *TaAQP7*, Enhances Drought Tolerance in Transgenic Tobacco. PLoS ONE 7(12): e52439. doi:10.1371/journal.pone.0052439

**Editor:** Lam-Son Phan Tran, RIKEN Plant Science Center, Japan

**Received:** June 27, 2012; **Accepted:** November 13, 2012; **Published:** December 20, 2012

**Copyright:** © 2012 Zhou et al. This is an open-access article distributed under the terms of the Creative Commons Attribution License, which permits unrestricted use, distribution, and reproduction in any medium, provided the original author and source are credited.

**Funding:** This work was supported by International S & T Cooperation Key Projects of MoST (Grant No. 2009DFB30340) (<http://www.cistc.gov.cn/>); National Genetically Modified New Varieties of Major Projects of China (2011ZX08002-004, 2011ZX08010-004) (<http://www.nmp.gov.cn/>); Key Projects of S & T Research of MoE of China (Grant No. 109105) (<http://www.moe.edu.cn/>); and Wuhan Municipal S & T research project (Grant No. 201120922286) ([http://www.whst.gov.cn/whst\\_Index.shtml](http://www.whst.gov.cn/whst_Index.shtml)). The funders had no role in study design, data collection and analysis, decision to publish, or preparation of the manuscript.

**Competing Interests:** The authors have declared that no competing interests exist.

\* E-mail: hegy@mail.hust.edu.cn (GH); ygx@mail.hust.edu.cn (GY)

† These authors contributed equally to this work.

## Introduction

In plants, water movement is an extremely important process and is controlled by the apoplastic and symplastic pathways. The latter is more efficient in regulating water transport across the membranes when a plant is in stress [1–3]. In the symplastic pathway, aquaporin (AQP) proteins, that form a large family in the major intrinsic protein (MIP) superfamily, play an important role. AQPs are known to transport water and other small molecules through biological membranes and many AQP genes have been identified from different plant species [4] including 35 from *Arabidopsis* [5], 36 from maize [6] and 33 from rice [7]. Compared to other species, little is known about the AQPs in wheat because of the unavailability of its complete genome sequence and the allohexaploid nature of its genome.

Many studies have shown that environmental stresses factors such as salt, drought and cold can upregulate AQPs and the transgenic approaches established that overexpression of some AQPs could improve the plant tolerance to abiotic stress [4,8–14]. In addition, AQPs activity may be directly regulated by phosphorylation, which in turn can be influenced by a number of stimuli, including abiotic stress [15–18], phytohormones [19] and H<sub>2</sub>O<sub>2</sub> [17]. Abscisic acid (ABA) is a well-recognized mediator

of water stress responses and its exogenous application is known to enhance root hydraulic conductivity in sunflower and maize [20,21]. Although several isoforms of AQPs facilitate H<sub>2</sub>O<sub>2</sub> transport across the tonoplast and plasma membrane [19,22], a number of studies have revealed that H<sub>2</sub>O<sub>2</sub> in turn could alter the phosphorylation state of AQPs by changing the AQPs structure that leads to the closure of water channels. In addition, H<sub>2</sub>O<sub>2</sub> can also cause AQP internalization resulting in the downregulation of plant water transport [17,23–26]. Notably, the activities of AQPs were higher in chilling-tolerant genotype than in chilling-sensitive genotype due to less oxidative damage to membranes supported by less IL and H<sub>2</sub>O<sub>2</sub> content in chilling-tolerant genotype during chilling stress [17]. However, the role of AQPs in enhancing the antioxidant system that relieves membrane damage under drought stress is unclear.

Production of wheat, a global staple crop is constrained by multiple environmental stress factors, such as drought, salinity and extreme temperature. An understanding of the molecular mechanisms underlying the response to abiotic stress responses is necessary for genetic improvement of stress tolerance in wheat. Although AQP genes respond to various stresses, their exact role in abiotic stress tolerance remains unclear. In the present study, we

characterized a wheat *AQP*, *TaAQP7*, and enhanced drought stress tolerance in transgenic tobacco by maintaining better water status, reducing  $H_2O_2$  accumulation and membrane damage via enhancing the activities and expression of superoxide dismutase (SOD; EC 1.15.1.1) and catalase (CAT; EC 1.11.1.6).

## Results

### *TaAQP7* Encodes a PIP2 Subgroup of AQP in Wheat

The cDNA of *TaAQP7* (GenBank ID: HQ650109), was amplified by RACE-PCR using mRNA isolated from the leaves of wheat seedlings. The full-length *TaAQP7* cDNA has 1019 bp with a 861 bp open reading frame (ORF) that translates into the *TaAQP7* protein with 286 amino acids and a predicted molecular mass of 30.36 kDa. Blastx analysis showed that *TaAQP7* shared a high degree of sequence similarity with *AQPs* from other plant species: 99% sequence identity with *HvPIP2-1* from *Hordeum vulgare*, 94% with *OsPIP2-2* from *Oryza sativa*, and 91% with *ZmPIP2-2* from *Zea mays*. The predicted *TaAQP7* protein contains six putative transmembrane  $\alpha$ -helices, a highly conserved amino acid sequence 'HINPAVTFG', and two 'NPA' motifs [27] (Fig. S1). In addition, it contained the conserved sequence (R/K)DYX(E/D)PP(P/R)X<sub>3-4</sub>(E/D)XXELXXWSF(Y/W)R that is found in all PIP members [27]. A phylogenetic tree was constructed (Fig. S2) based on the amino acid sequence alignment of plant *AQPs* with Arabidopsis, rice and wheat sequences obtained from GenBank. This showed that on an evolutionary timescale, *TaAQP7* was close to PIP2 subfamily suggesting that the wheat *TaAQP7* obtained in this study is a member of the PIP2 subfamily.

### Expression of *TaAQP7* in *Xenopus laevis* Oocytes Enhances Water Permeability

To determine whether the *TaAQP7* is a functional *AQP*, water channel activity of the protein was assayed in *Xenopus laevis* oocytes. Two days after cRNA or water injection, the rate of change in cell volume (Fig. 1A) and the osmotic water permeability coefficient (Pf) (Fig. 1B) were calculated in osmotic solution. Oocyte swelling in *TaAQP7*-expressing oocytes and controls are shown in Video S1. The rate of change in cell volume was higher in *TaAQP7*-expressing oocytes than in water-injected oocytes after osmotic treatment. Oocytes expressing *TaAQP7* showed 6-fold higher Pf than the water-injected oocytes, suggesting that *TaAQP7* is a functional *AQP* with high water channel activity.

### *TaAQP7* is Ubiquitously Expressed in Wheat Tissue

*AQPs* not only mediate water transport across plant membranes, but also play a significant role in the different tissues of plants during unfavorable environmental conditions [27]. To determine the expression patterns of *TaAQP7* in different wheat tissues, real-time quantitative polymerase chain reaction (qRT-PCR) was carried out with mRNAs isolated from different tissues as templates (Fig. S3). The results showed *TaAQP7* expression in all organs including root, stem, leaf, stamen, pistil and lemma with higher expression levels in root, stem and leaf.

### Dehydration Stress Upregulates *TaAQP7* Expression in Wheat Seedlings

Relative water content (RWC) is a specific tool for the measurement of drought tolerance and gives a credible evaluation of the plant water status [28]. In fact, RWC estimates the deficit in

water level in a given time, which is used to reflect dehydration stress [29]. To investigate the relationship between dehydration stress and expression of *TaAQP7*, RWC was measured in untreated wheat seedlings and dehydration stress induced seedlings at different times after the treatment. In parallel, changes in *TaAQP7* expression were also analyzed in these samples by qRT-PCR (Fig. 2). Compared to the well hydrated control, seedlings under dehydration stress displayed lower RWC when the duration of dehydration was increased from 2 to 12 h (Fig. 2A). qRT-PCR showed that the expression level of *TaAQP7* increased by 5.2-fold within 2 h of dehydration stress but reduced to normal levels 12 h after dehydration treatment (Fig. 2B). These results indicated that even a slight water stress could rapidly increase the expression of *TaAQP7*.

### *TaAQP7* is Upregulated in Response to Polyethylene Glycol (PEG), ABA and $H_2O_2$ Treatments

We studied the expression of *TaAQP7* for 24 h after treatments with polyethylene glycol (PEG), ABA, methyl jasmonate (MeJA), salicylic acid (SA), auxin and  $H_2O_2$ . After PEG treatment, the *TaAQP7* transcripts increased 6.5-fold in the first 2 h followed by a decrease and the overall expression of *TaAQP7* remained higher in treated plants when compared to controls (Fig. 2C). The expression levels of *TaAQP7* also increased to a maximum at 2 h (5.1-fold) after ABA treatment and at 6 h (12.9-fold) with  $H_2O_2$  treatment (Fig. 2D and E). MeJA treatment also increased the expression of *TaAQP7* continuously, while auxin and salicylic acid treatments inhibited *TaAQP7* expression (Fig. S4). These data indicate that *TaAQP7* is induced by PEG, ABA,  $H_2O_2$  and MeJA and a similar gene expression pattern is observed during PEG, ABA,  $H_2O_2$  treatments.

### ABA is Involved in the Induction of *TaAQP7* by PEG Treatment

To explore whether the upregulation of *TaAQP7* under PEG treatment involves ABA and  $H_2O_2$  signaling, tungstate was chosen as the inhibitor of ABA biosynthesis and dimethylthiourea (DMTU) was chosen as the scavenger of  $H_2O_2$  [30,31]. Plants were pretreated with tungstate and DMTU for 2 h and 6 h followed by PEG treatment. The results clearly show that *TaAQP7* reached a maximum at 2 h (6.3-fold) and 6 h (3.0-fold) after the treatment with PEG (Fig. 3A), consistent with the results in Fig. 2C. Treatment with tungstate reduced the maximum fold increase to 2.8-fold at 2 h and 0.9-fold at 6 h after the PEG treatment, while DMTU had no effect on the upregulation of *TaAQP7* (Fig. 3A). In addition, after treatment with tungstate, the expression of *TaAQP7* was inhibited, while the DMTU treatment had no effect on *TaAQP7* transcript (Fig. 3).  $H_2O_2$  plays an important role in signal transduction of various plant cells/tissues under abiotic stress, and evidence suggests the function of  $H_2O_2$  down-stream of ABA [32–40]. Therefore, we determined the role of  $H_2O_2$  in the upregulation of *TaAQP7* expression induced by ABA. First, wheat seedlings were pretreated with DMTU for 2 h and 6 h to stop the production of  $H_2O_2$  [30,40] followed by exposure to ABA treatment for 2 and 6 h. Fig. 3B shows that *TaAQP7* was induced by ABA 2 (6.5-fold) and 6 h (3.5-fold) after treatment, which is in line with the results in Fig. 2D. In addition, pretreatments with  $H_2O_2$  scavenger had no effect on the upregulation of *TaAQP7* in the ABA-treated wheat seedlings (Fig. 3B). These results suggest that PEG induced upregulation of *TaAQP7* possibly involves ABA signaling but the upregulation

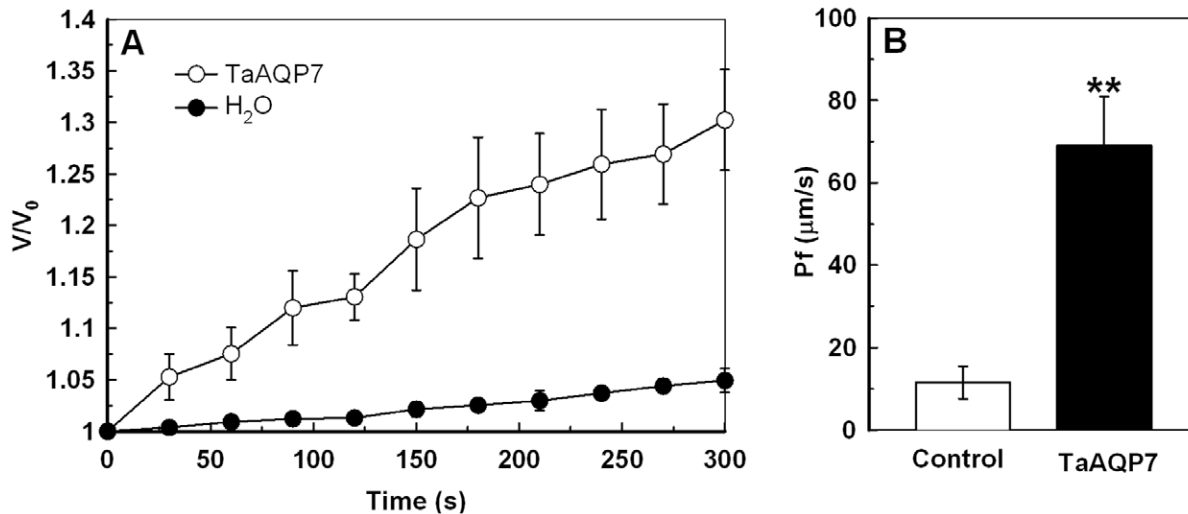

**Figure 1. Water channel activity test of *TaAQP7*.** (A) The swelling rates of *Xenopus laevis* oocytes injected with cRNA encoding *TaAQP7* or water (as negative control). The rate of oocyte swelling upon immersion in hypo-osmotic medium is plotted as  $V/V_0$  versus time, where  $V$  is the volume at a given time point and  $V_0$  is the initial volume. (B) Osmotic water permeability coefficient (Pf) of oocytes injected with cRNA encoding *TaAQP7* or water. The Pf values were calculated from the rate of oocyte swelling. Vertical bars indicate  $\pm$ SE of three replicates on one sample (Each replicate contains three oocytes). Asterisks indicate significant difference between oocytes injected with cRNA encoding *TaAQP7* and water ( $*p < 0.05$ ;  $**p < 0.01$ ). Three biological experiments were performed, which produced similar results. doi:10.1371/journal.pone.0052439.g001

of *TaAQP7* induced by PEG and ABA treatment may not involve  $H_2O_2$ .

#### Generation of Transgenic Tobacco Overexpressing *TaAQP7*

The role of *TaAQP7* in drought stress tolerance was further investigated by generating transgenic tobacco plants overexpressing *TaAQP7* under the control of CaMV 35S promoter. A total of 13 transgenic lines ( $T_1$ ) were selected by resistance to hygromycin and confirmed by PCR using primers specific to *TaAQP7* and *GFP* (data not shown). Among the  $T_1$  lines, three lines (OE6, OE9 and OE13) segregated with a ratio of 3:1 for hygromycin resistance. In addition, all the three independent transgenic  $T_2$  line seedlings survived on MS medium containing 40 mg/L of hygromycin. In this experiment, tobacco plants transformed with only the vector served as a negative control and were subjected to the same analysis.

#### Overexpression of *TaAQP7* Improves Tolerance of Transgenic Tobacco Plants to Drought Stress

Phenotypes of the transgenic lines, the vector control (VC) and the wild type (WT) under drought stress were recorded. After 20 d of drought stress, leaf wilting was evident in the WT and VC in comparison with the three transgenic lines in both three- and six-week-old tobacco plants (Fig. 4A and B). Five days after providing water, most of the three-week-old VC and WT plants were dead, while most of the transgenic lines survived (Fig. 4B). RT-PCR analysis showed the presence of *TaAQP7* mRNA in the three transgenic lines (OE6, OE9 and OE13) but not in WT and VC (Fig. 4C). Among the transgenic lines OE6 and OE9 had higher *TaAQP7* expression levels. As shown in Fig. 4B, some of the rosette leaves were curled in OE13, while in OE6 and OE9 they remain expanded. Thus, the lines (OE6 and OE9) with higher expression of *TaAQP7* showed an increased tolerance to drought stress, suggesting that the overexpression of *TaAQP7* could improve plants' tolerance to drought stress.

#### Overexpression of *TaAQP7* Enhances the Osmotic Stress Tolerance

To detect the differences in the germination rates of seeds in transgenic, WT and VC, plants were germinated on MS medium supplemented with 0 and 300 mM mannitol for 12 days. Germination rates were remarkably higher in the transgenic lines (OE6 - 83.60, OE9 - 78.05 and OE13 - 78.83) relative to the WT (19.78) and VC (21.90) on medium with 300 mM mannitol (Fig. 5B and b), while little difference was observed between the transgenic lines and control plants grown on MS medium without mannitol (Fig. 5A and a). Seedlings grown on MS medium alone for 7 days were transferred to MS or MS supplemented with 0, 150 or 300 mM mannitol for 7 days followed by root length measurement. On MS medium alone, all the transgenic plants showed little or no difference in growth compared to WT and VC plants (Fig. 5C and F). On MS containing 150 mM mannitol, longer root length was observed in the transgenic lines OE6 (16.85 mm), OE9 (16.25 mm) and OE13 (18.4 mm) when compared to WT (13.10 mm) and VC (12.85 mm) (Fig. 5D and F). Similarly, on MS containing 300 mM mannitol, the transgenic lines OE6 (12.65 mm), OE9 (11.23 mm) and OE13 (13.50 mm) exhibited longer root length than WT (7.85 mm) and VC (7.35 mm) (Fig. 5E and F). These results indicate that seed germination and root elongation in transgenic tobacco plants overexpressing of *TaAQP7* were acclimatized to osmotic stress.

#### Overexpression of *TaAQP7* Improves the RWC and Decreases Malonaldehyde (MDA) and Ion Leakage (IL) under Drought Stress

Enhanced drought tolerance in transgenic lines compared to the WT led us to observe differences in their physiology. The RWC results show that loss of water in the OE6 (91.3–72.9%), OE9 (88.4–63.7%) and OE13 (85.3–69.1%) transgenic lines was remarkably lesser compared to the WT (63.4–48.3%) when subjected to 15 and 30 d drought stress (Fig. 6A). Ion leakage (IL), an important indicator of membrane injury, was significantly

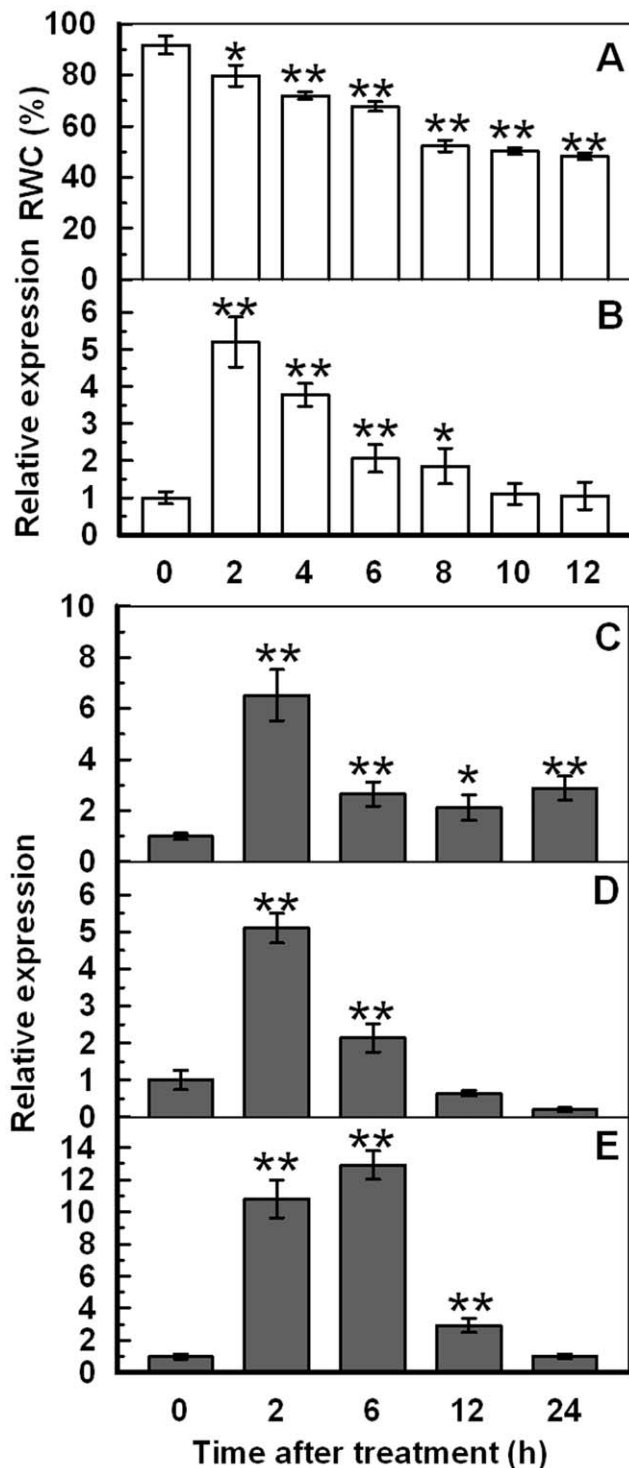

**Figure 2. RWC and expression of *TaAQP7* in wheat seedlings with different treatments.** Ten-day-old wheat seedlings were subjected to 12 h dehydration treatment and the wheat leaves were sampled to measure RWC (A) and the expression of *TaAQP7* (B). Ten-day-old wheat seedlings were treated with 20% of PEG6000 (C), 100  $\mu$ M ABA (D), and 10 mM  $H_2O_2$  (E) and leaves were sampled within 24 h to extract RNA for qRT-PCR analysis. The relative fold difference in mRNA level was calculated using the  $2^{-\Delta\Delta Ct}$  formula with *TaActin* as internal control. The mRNA fold difference was relative to that of distilled water treated samples used as calibrator. Vertical bars indicate  $\pm$ SE of four replicates on one sample. Asterisks indicate significant difference between the RWC or relative fold difference in mRNA level ( $*p < 0.05$ ;

$**p < 0.01$ ). When no bar is shown, the deviation is smaller than the symbol. Three biological experiments were performed, which produced similar results.

doi:10.1371/journal.pone.0052439.g002

higher in the WT (50.3–68.0%) than in OE6 (21.3–28.7%), OE9 (17.7–29.6%) and OE13 (24.4–21.7%) under drought stress. This suggested that the transgenic plants suffered less membrane damage than WT (Fig. 6B). Malonaldehyde (MDA) is the product of lipid peroxidation caused by reactive oxygen species (ROS), and is in general used to evaluate ROS-mediated injuries in plants [41]. The MDA measurement displayed a pattern similar to the IL and was lower in the transgenic lines relative to the WT under drought stress (Fig. 6C). These physiological indices demonstrated that the transgenic lines were more resistant to drought stress.

### Overexpression of *TaAQP7* Increases the SOD and CAT Activities, and Decreases the $H_2O_2$ Content under Drought/osmotic Stress

The lower ion leakage and MDA level in three transgenic lines imply that they may suffer less membrane damage and lipid peroxidation when compared to WT under drought stress. Therefore, we determined the levels of ROS accumulation in the transgenic and WT plants before and after drought stress. As shown in Fig. 7A, all three transgenic lines had lower  $H_2O_2$  content (OE6 3.5–8.6, OE9 3.6–9.3 and OE13 3.8–8.9) than the WT (5.4–12.4) after exposure to drought for 15 and 30 d. In addition, antioxidant enzymes are known to play significant roles in ROS scavenging which influences the cellular ROS levels. Therefore, the activities of CAT, SOD and peroxidase (POD; EC 1.11.1.7) were measured in leaves of plants before and after drought treatment. After 15 and 30 d drought stress the transgenic lines had significantly higher SOD (OE6 194.3–299.5, OE9 185.4–341.2 and OE13 183.3–316.3) and CAT (OE6 1684.2–3643.4, OE9 1650.8–4230.7 and OE13 1856.7–4104.3) activities than the WT (SOD 133.2–226.3, CAT 935.5–2291.0) (Fig. 7B and C). There was no obvious difference in POD activity between transgenic lines and WT under drought treatment (data not shown).

To evaluate the content of  $H_2O_2$  and the activities of SOD and CAT in WT and transgenic lines under osmotic stress, whole seedlings were used. After 7 d of mannitol treatment, the transgenic lines accumulated lower amounts of  $H_2O_2$  than WT as observed by the accumulation of brown pigment (DAB staining) (Fig. 8A), and little difference was observed under normal conditions. The  $H_2O_2$  content and, SOD and CAT activities after mannitol treatment showed a pattern similar to the drought stress treatment (Fig. 8B, C and D) suggesting that overexpression of *TaAQP7* reduced  $H_2O_2$  accumulation and enhanced SOD and CAT activities under drought/osmotic stress.

### *TaAQP7*-overexpressing Tobacco Plants Exhibit Higher SOD and CAT Activities Relative to WT when they were in the same Water Status under Drought Conditions

To determine whether the enhancement of antioxidant enzyme activity in the transgenic lines was linked to better water status, all parameters including IL, MDA and  $H_2O_2$  levels, and SOD and CAT activities were measured in WT and transgenic plants under the same RWC. After 16 d drought stress, the WT displayed greater decrease in RWC than transgenic plants (Fig. 9A) and the RWC in transgenic lines after 16 d was close to that in WT after 8 d of drought treatment. In addition, MDA and IL (Fig. 9B and C) were lower, SOD and CAT activities were higher (Fig. 9E and F) and no difference was observed in  $H_2O_2$  content (Fig. 9D) in the

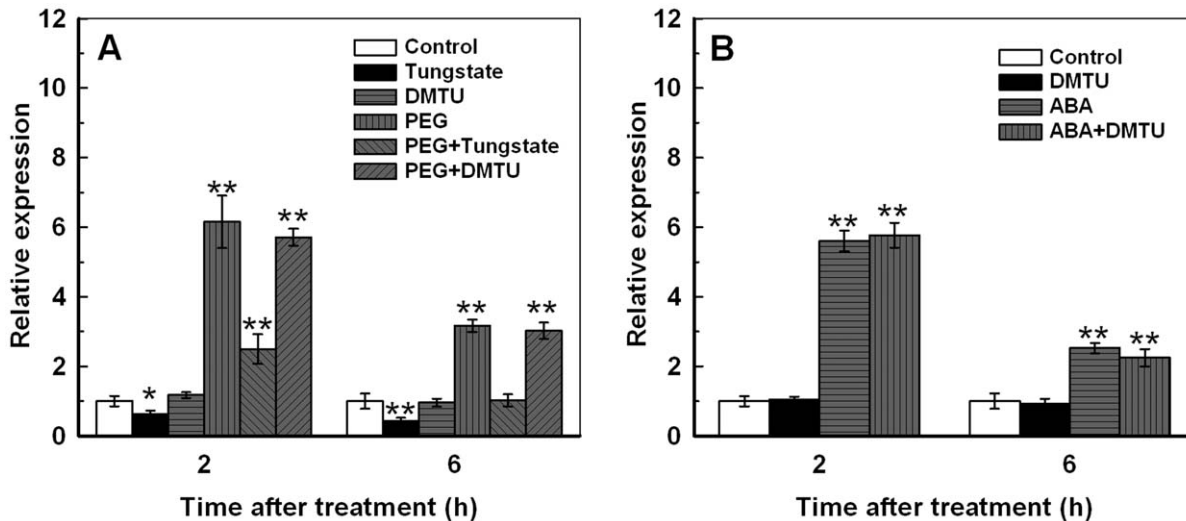

**Figure 3. Effects of inhibitors of signaling molecules on the *TaAQP7* transcripts under PEG and ABA treatments.** A: Effects of pretreatment with inhibitors of ABA biosynthesis and scavenger  $H_2O_2$  on the expression of *TaAQP7* in the leaves of wheat seedlings exposed to PEG. The plants were pretreated with distilled water, 1 mM tungstate, and 5 mM DMTU for 2 h and 6 h respectively, and then exposed to 20% PEG6000 for 2 h and 6 h respectively. The treatment of tungstate or DMTU alone was also performed in the experiment. The plants treated with distilled water for 2 h or 6 h were used as control. B: Effects of pretreatment with scavenger of  $H_2O_2$  on the expression of *TaAQP7* in the leaves of wheat seedlings exposed to ABA. The plants were pretreated with distilled water, and 5 mM DMTU for 2 h and 6 h respectively, and then exposed to 100  $\mu$ M ABA for 2 h and 6 h respectively. The treatment of DMTU alone was also performed in the experiment. The plants treated with distilled water for 2 h or 6 h were used as control. The y-axis represents the relative fold difference in mRNA level calculated using the  $2^{-\Delta\Delta Ct}$  formula with *TaActin* as internal control. The mRNA fold difference was relative to that of distilled water treated samples used as calibrator. Vertical bars indicate  $\pm$ SE of four replicates on one sample. Asterisks indicate significant difference between the expression of *TaAQP7* under different treatment (\* $p < 0.05$ ; \*\* $p < 0.01$ ). When no bar is shown, the deviation is smaller than the symbol. Three biological experiments were performed, which produced similar results. doi:10.1371/journal.pone.0052439.g003

transgenic plants compared to WT under similar water status. These results suggest that the higher activities of SOD and CAT in the transgenic plants are not related to the water status.

### TaAQP7 is Localized in the Plasma Membrane

To investigate its cellular localization, the *TaAQP7* ORF was cloned into the pCAMBIA1304-GFP vector downstream of the constitutive promoter, CaMV 35S and upstream of *GFP* to create *TaAQP7*-GFP fusion construct. The *TaAQP7*-GFP fusion protein and pm-rk (Plasma membrane marker) were co-expressed in onion epidermal cells by particle bombardment, which is an established method to investigate subcellular localization of GFP-proteins in plant cells [42,43]. After incubation at 25°C for 24 h, the green fluorescence and red pm-rk were both confined to the plasma membrane (Fig. 10A, B and C). In addition, the subcellular localization of the *TaAQP7*-GFP fusions in young roots from transgenic tobacco seedlings was observed under a microscope. In the root cells of *TaAQP7*-GFP-transformed plants (Fig. 10E, F, G), GFP-tagged *TaAQP7* protein was mostly localized in the plasma membranes of cells while no uorescence was observed in the nuclei. In contrast, uorescence was found in cell nuclei, cytoplasm and plasma membrane in the root cells of plants expressing only GFP (Fig. 10D). Thus, *TaAQP7* protein was confirmed to be localized in the plasma membrane of cells.

### Discussion

Although more than 35 *AQP* genes have been identified in wheat genome to date, the function of only a handful of them, such as *TaNIP*, *TdPIP1;1* and *TdPIP2;1* have been characterized [14,44,45]. In the present study, an *AQP* cDNA from wheat, designated *TaAQP7*, was cloned and characterized. *TaAQP7* shared a high degree of sequence similarity with *AQPs* from

*Hordeum vulgare*, *Oryza sativa*, and *Zea mays*. Amino acid sequence analysis showed that *TaAQP7* contains six putative transmembrane  $\alpha$ -helices and a conserved sequence which is found in all PIP members (Fig. S1) [27]. The cellular localization studies revealed that *TaAQP7* localizes in the plasma membrane (Fig. 10), which is consistent with the characteristics of intrinsic membrane proteins. In addition, on the evolutionary timescale, *TaAQP7* displayed a close evolutionary relationship with PIP2 subfamily that is important for the water channel activity (Fig. S2) [12]. Accordingly, *TaAQP7*-overexpressing oocytes exhibited higher Pf than controls (Fig. 1B), suggesting that it is a functional AQP with high water channel activity which is a feature of the PIP2 subfamily. Expression pattern in different tissue indicates that *TaAQP7* is mainly expressed in vegetative tissues (Fig. S3). These data allow us to conclude that *TaAQP7* belongs to the PIP2 subfamily of AQP.

Numerous studies have shown that *AQPs* play an important role in abiotic stress such as salt [4,9,14], drought [9,12] and cold [8,10]. During the dehydration treatment, even a slight water stress rapidly enhanced the expression of *TaAQP7*, which suggests that the *TaAQP7* gene was very sensitive to dehydration stress (Fig. 2B). Accordingly, PEG treatment could also rapidly upregulate *TaAQP7* (Fig. 2C). The different responses of *AQPs* expression (up/downregulation or no change) to water stress is widely observed in plants. In Arabidopsis, drought treatment rapidly reduced the expression level of *PIP1;5*, *PIP2;2*, *PIP2;3*, and *PIP2;6* transcripts to one-tenth of the level under normal condition [46]. However, *AtPIP1-4* and *AtPIP2-5* transcripts in Arabidopsis leaves were upregulated under drought stress [47]. Thus, the response of AQP family members to drought stress exhibits different patterns. In addition, *AQPs* present in the same species, but in different cultivars, can respond differently to abiotic stress [48,49].



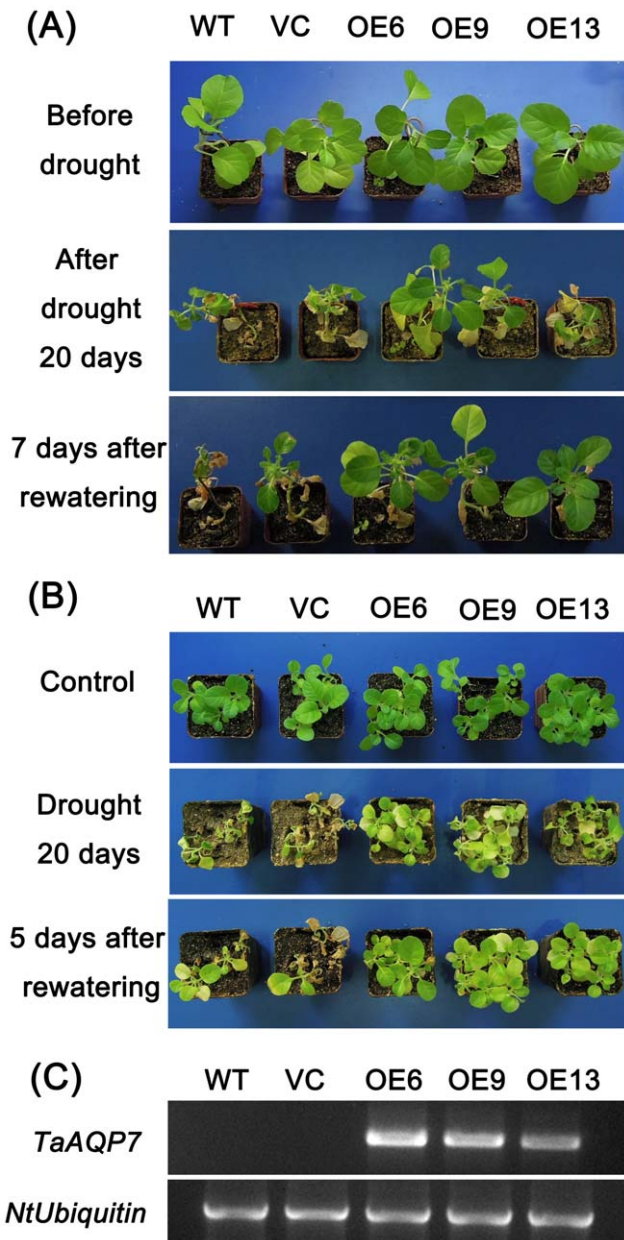

**Figure 4. Enhanced drought tolerance in transgenic lines when compared with the WT and VC.** The WT, VC and transgenic lines were cultured in MS medium under a 16 h light/8 h dark cycle at 25°C for one week, and then the plants were transplanted to containers filled with a mixture of soil and sand (3:1) where they were regularly watered for two or five weeks. Six-week-old seedlings of transgenic and WT tobacco plants grown in pots were deprived of water for 20 d and the photos were taken (A). Three-week-old seedlings of transgenic and WT tobacco plants grown in pots were deprived of water for 20 d and the photos were taken (B). The whole two-week-old seedlings of transgenic plants and WT were used to extract RNA to detect *TaAQP7* expression by RT-PCR with *NtUbiquitin* as an internal control (C). Three biological experiments were performed, which produced similar results. doi:10.1371/journal.pone.0052439.g004

Plants produce various endogenous signaling molecules, such as ABA, ethylene and  $H_2O_2$ , when subject to abiotic stress. Exogenous application of ABA, an established mediator of water stress response, enhanced root hydraulic conductivity in sunflower and maize [20,21], and affected expression of *AQP*s in rice,

*Craterostigma plantagineum*, Arabidopsis, and tobacco [50–53]. The response of each *AQP* to ABA is different, implying that the regulation of *AQP* expression involves both ABA-dependent and ABA-independent signaling pathways [54]. In addition, although several isoforms of *AQP*s are able to facilitate  $H_2O_2$  transport across the tonoplast and plasma membrane [19,22],  $H_2O_2$  has been reported as an inhibitor of water transport by *AQP*s [17,23,55–57]. In wheat, the signaling pathway involved in regulating *AQP*s expression is poorly understood [14]. In the present study, the tungstate which is an inhibitor of ABA biosynthesis could inhibit the upregulation of *TaAQP7* under PEG treatment, suggesting that endogenous ABA signaling might be involved in the upregulation of *TaAQP7* induced by PEG treatment (Fig. 3A). However, DMTU which is a scavenger of  $H_2O_2$ , had no effect on the upregulation of *TaAQP7* after PEG and ABA treatment (Fig. 3B), implying that endogenous  $H_2O_2$  might not contribute to the upregulation of *TaAQP7* induced by PEG and ABA treatments. These results indicate that although both exogenous ABA and  $H_2O_2$  upregulated *TaAQP7*, they may play different roles in regulating *TaAQP7* expression after PEG treatment. In addition, the response of *TaAQP7* to MeJA and SA implies that *TaAQP7* maybe also involved in these molecules mediated signaling pathway.

In order to further understand the function of *TaAQP7* under drought stress, we generated transgenic tobacco plants over-expressing *TaAQP7* under the control of the constitutive CaMV 35S promoter. Transgenic plants exhibited improved tolerance against drought stress when compared to WT in one-, three- and six-week- old tobacco plants (Fig. 4 and 5). These results are consistent with previous studies on *AQP* genes conferring abiotic stress to plants [2,4,9,11,13,14,58,59]. However, studies have also shown that overexpression of some *AQP* isoforms increased sensitivity to drought stress [11,46,60]. The various phenotypes of *AQP*s-overexpressing plants displayed under abiotic stress may be due to a cumulative effect on water transport property, transpiration rate and stomatal aperture [2,4,11,25,58].

Land plants have evolved to cope with rapid changes in the availability of water by regulating all aquaporins that play an important role in water uptake and movement [61,62]. Numerous studies have shown that overexpression of *AQP*s enhanced the ability of plants to tolerate abiotic stress by improving water use efficiency, hydraulic conductivity and retaining better water status [2,4,11,58,59]. In our study, the RWC was similar in transgenic lines and WT under normal conditions, while under drought stress it was remarkably lower in WT when compared to the transgenic lines (Fig. 6A), implying that transgenic lines retain better water status than WT under drought stress. In addition, it is noteworthy to state that overexpression of *HvPIP2;1* that shares high similarity with *TaAQP7* also leads to an increased transpiration rate and slightly decreased intrinsic water-use efficiency under normal conditions [63]. This difference could be due to different conditions to which the tested plants were subjected. Thus, it is speculated that water loss stimulates the expression of *TaAQP7* to maintain better water status, supported by the upregulation of *TaAQP7* under dehydration and PEG treatments. Drought stress always induces a rapid accumulation of ROS and damages the cell membrane by oxidizing proteins, lipids, and DNA [64,65]. Overexpression of *AQP*s was reported to decrease IL and MDA that are important indicators of membrane injury under stress. IL was found to be lower in *OsPIP2;7*-overexpressing rice when compared to the controls under chilling stress [59] and *BjPIP1*-overexpressing plants showed lower levels of IL and MDA

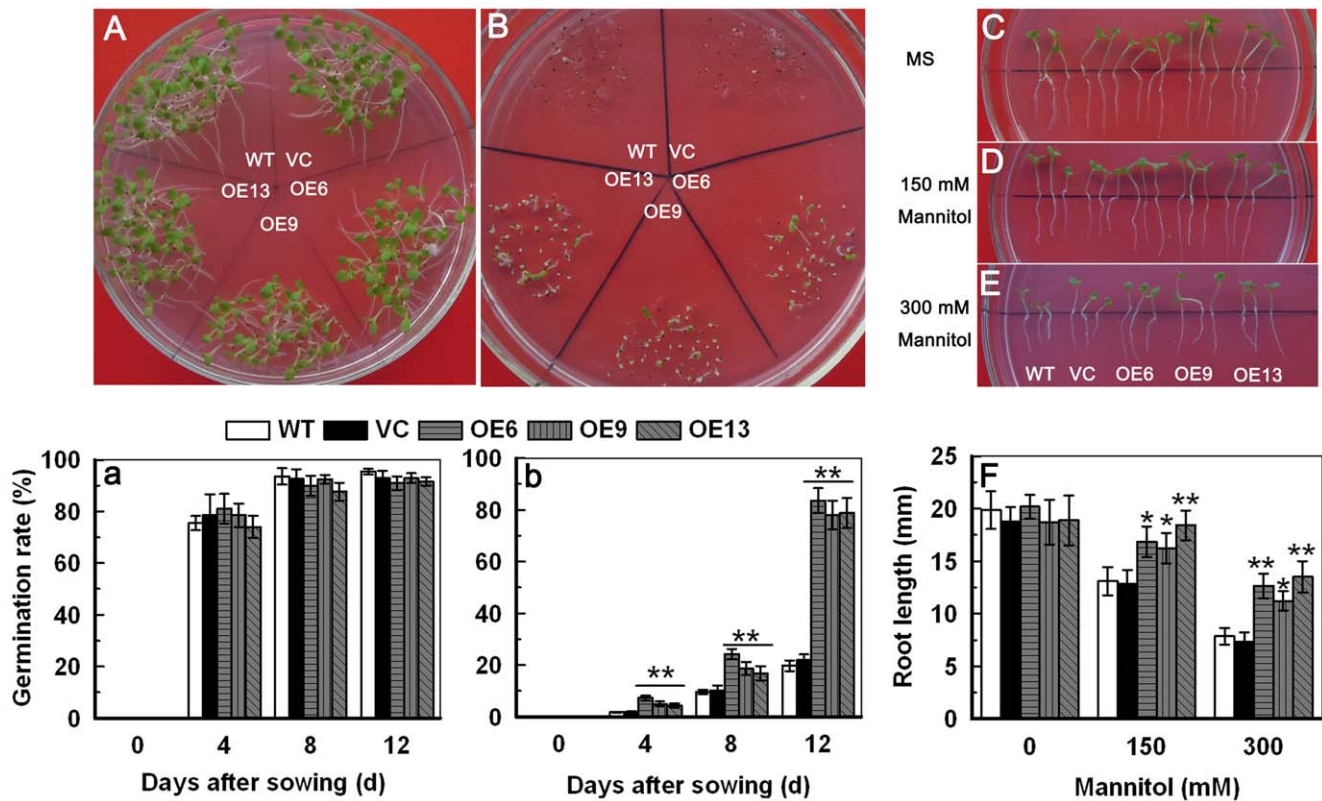

**Figure 5. Osmotic tolerance analysis of *TaAQP7*-overexpressing plants.** A total of 200 surface-sterilized seeds of each transgenic line, WT or VC germinated on MS medium containing 0 (A, a) or 300 mM (B, b) mannitol for 12 d, and the germination rate was calculated. A, B are photos of the first 12 days after germination on mediums. The WT, VC and transgenic lines were cultured in MS medium under a 16 h light/8 h dark cycle at 25°C for one week, and then the seedlings were transplanted to MS or MS supplied with 150 or 300 mM mannitol for one week. The photographs were taken (C, D, E) and root length was calculated (F). Vertical bars indicate  $\pm$ SE calculated from four replicates. Asterisks indicate significant difference between the WT and the three transgenic lines (\* $p$ <0.05; \*\* $p$ <0.01). Three biological experiments were performed, which produced similar results. doi:10.1371/journal.pone.0052439.g005

under Cd stress [66]. IL and MDA measurements in the present study showed that transgenic lines had less IL and MDA than WT under drought stress (Fig. 6B and C) suggesting that transgenic lines were subjected to less membrane injury. MDA, the product of lipid peroxidation caused by ROS, is in general used to evaluate ROS-mediated injuries in plants [41]. Thus, these studies imply that the lipid peroxidation caused by ROS damage is relatively relieved in transgenic plants under drought stress.

ROS have been shown to alter aquaporin structure, thereby leading to channel closure through direct oxidative mechanism [67], or induce internalization of PIPs and reduce hydraulic conductivity through cell signaling mechanisms [23].  $H_2O_2$ -mediated decrease in water transport under abiotic stress has been reported in previous studies. In the roots of Arabidopsis plants, NaCl concomitantly induced the accumulation of ROS and inhibition of hydraulic conductivity concomitantly [23]. Rapid accumulation of  $H_2O_2$  in cucumber roots after exposure to low temperature resulted in a decrease in water transport [55]. The activities of AQPs were higher in chilling-tolerant genotype than in chilling-sensitive genotype due to less IL and  $H_2O_2$  content in chilling-tolerant genotype during chilling stress [17]. In addition, the positive role of  $H_2O_2$  in stress tolerance was also identified. Active BR signaling can induce gene expression of the nicotinamide adenine dinucleotide phosphate (NADPH) oxidase to regulate  $H_2O_2$  production to confer abiotic and biotic stress tolerance [68]. Low concentration of

$H_2O_2$  can increase the PIP protein abundance and promote the root growth in *Phaseolus vulgaris*, which reflects the dual function of ROS in plant [69]. However, whether overexpression of AQPs contributes to reduced ROS accumulation is uncertain. Therefore, the ROS level was measured in transgenic plants and WT in the present study. The results showed that transgenic lines accumulated much lower levels of  $H_2O_2$  relative to WT in one- and three-week-old tobacco plants under drought/osmotic stress (Fig. 7A, 8A and B), which suggested that overexpression of *TaAQP7* was benefited for reducing  $H_2O_2$  accumulation under drought stress.

In order to detoxify stress-induced ROS, plants have evolved a complex antioxidant system, in which several enzymes play essential roles such as scavenging ROS and protecting cells against oxidative stress [70–72]. In the present study, activities of antioxidant enzymes such as SOD and CAT were enhanced in one- (Fig. 8C and D) and three-week-old transgenic tobacco plants (Fig. 7B and C) under drought/osmotic stress, indicating that overexpression of *TaAQP7* effectively improved the antioxidant defense system, which in turn protected transgenic lines against ROS-mediated injury under drought/osmotic stress. Similarly, *BjPIP1*-overexpressing plants showed higher activities of antioxidant enzymes under Cd stress than WT [66], implying that antioxidant system may be involved in AQP<sub>s</sub> conferring abiotic stress in plants. Here, we have provided physiological evidence that *TaAQP7* confers drought stress tolerance by enhancing SOD and CAT activities. In addition, the transgenic lines had higher

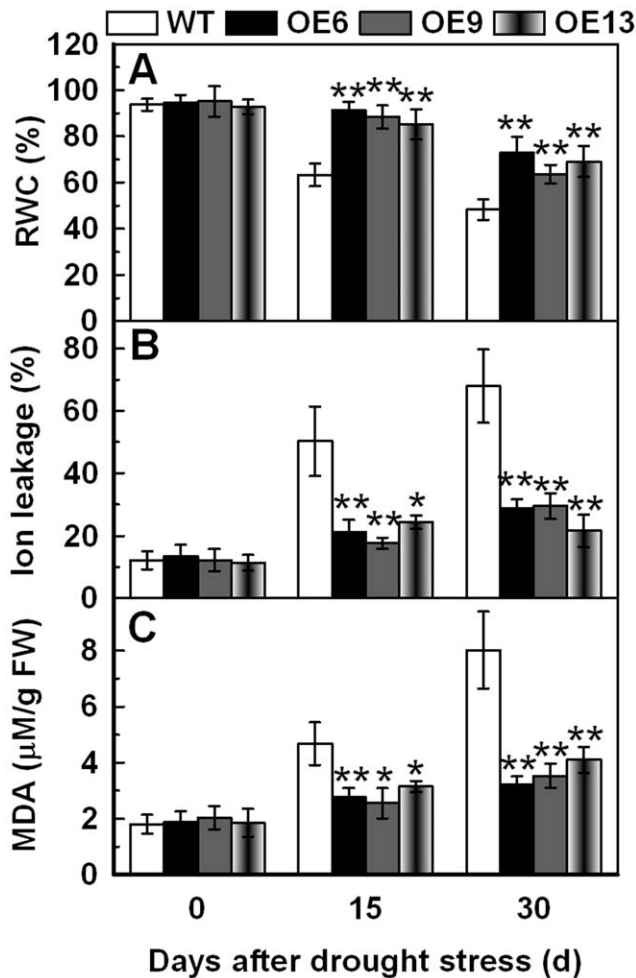

**Figure 6. Analysis of RWC, IL and MDA in transgenic lines under drought stress.** The WT and transgenic lines were cultured in MS medium under a 16 h light/8 h dark cycle at 25°C for one week, and then the plants were transplanted to containers filled with a mixture of soil and sand (3:1) where they were regularly watered for two weeks. Three-week-old tobacco plants were deprived of water for 30 d. Tobacco leaves were sampled from WT and transgenic lines under drought stress for 15 d and 30 d to detect RWC (A), IL (B) and MDA (C). Vertical bars indicate  $\pm$ SD calculated from four replicates. Asterisks indicate significant difference between the WT and the three transgenic lines (\* $p$ <0.05; \*\* $p$ <0.01). Three biological experiments were performed, which produced similar results. doi:10.1371/journal.pone.0052439.g006

activities of SOD and CAT, and lower membrane injury than the WT when they were in the same water status under drought stress (Fig. 9). Therefore, higher antioxidant enzyme activity displayed by the transgenic plants under drought stress may not be due to the better water status but most likely due to less damage caused to the cell membrane which could protect the protein machinery from dehydration damage.

In conclusion, a *PIP2* subgroup *AQP* gene, *TaAQP7*, was cloned and characterized. *TaAQP7* confers drought stress tolerance not only by retaining better water status but also by reducing ROS accumulation and membrane damage via enhancing the activities and expression of antioxidant enzymes. Further work will emphasize the mechanism of *AQP3* on the sophisticated antioxidative system under drought stress.

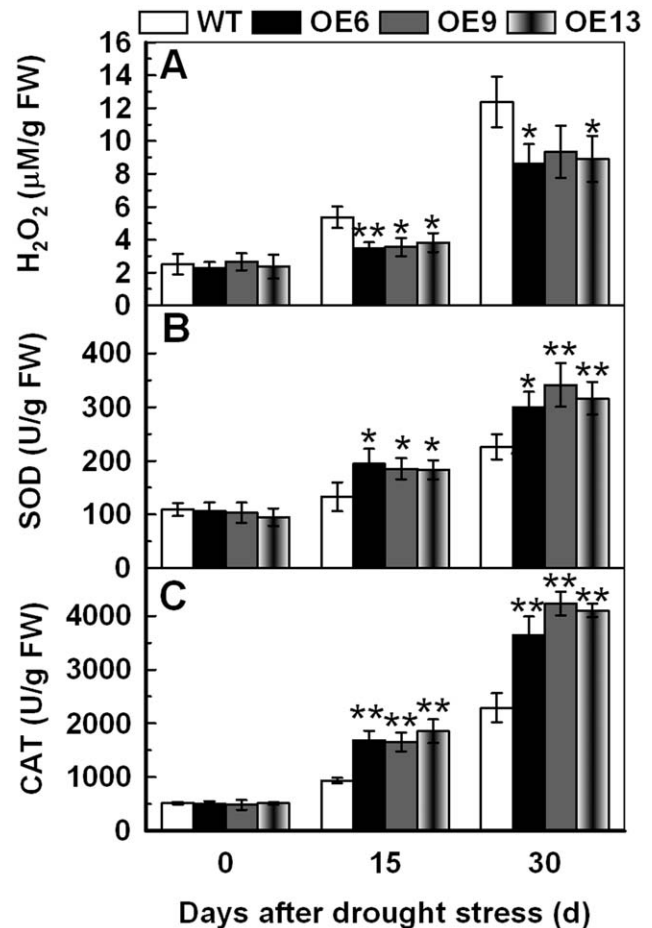

**Figure 7. Analysis of H<sub>2</sub>O<sub>2</sub> content, SOD and CAT activities in transgenic lines under drought stress.** The WT and transgenic lines were cultured in MS medium under a 16 h light/8 h dark cycle at 25°C for one week, and then the plants were transplanted to containers filled with a mixture of soil and sand (3:1) where they were regularly watered for two weeks. Three-week-old tobacco plants were deprived of water for 30 d. Tobacco leaves were sampled from WT and transgenic lines under drought stress for 15 d and 30 d to detect H<sub>2</sub>O<sub>2</sub> content (A), SOD (B) and CAT (C) activities. Vertical bars indicate  $\pm$ SD calculated from four replicates. Asterisks indicate significant difference between the WT and the three transgenic lines (\* $p$ <0.05; \*\* $p$ <0.01). Three biological experiments were performed, which produced similar results. doi:10.1371/journal.pone.0052439.g007

## Materials and Methods

### Plant Materials and Treatments

Wheat (*Triticum aestivum* L. cv. Chinese Spring) seeds were surface-sterilized with 75% (v/v) ethanol for 2 min and 1% (v/v) bichloride for 10 min, and then washed with sterile water three times. The sterilized seeds germinated on sterile water and grown in Murashige and Skoog (MS) liquid medium under a 16 h light/8 h dark cycle at 25°C. For PEG treatment, the 10-day-old seedlings were transferred into Petri dishes containing 20% PEG6000 solution and the plants were incubated under light for different time. For signaling molecules treatments, the 10-day-old seedlings were sprayed with 100 µM ABA, 100 µM MeJA, 50 µM auxin, 2 mM salicylic acid or 10 mM H<sub>2</sub>O<sub>2</sub> respectively and the plants were incubated under light for different time. For inhibitors treatment, the plants were pretreated with 1 mM tungstate, and 5 mM DMTU for 2 h and 6 h respectively, and then exposed to



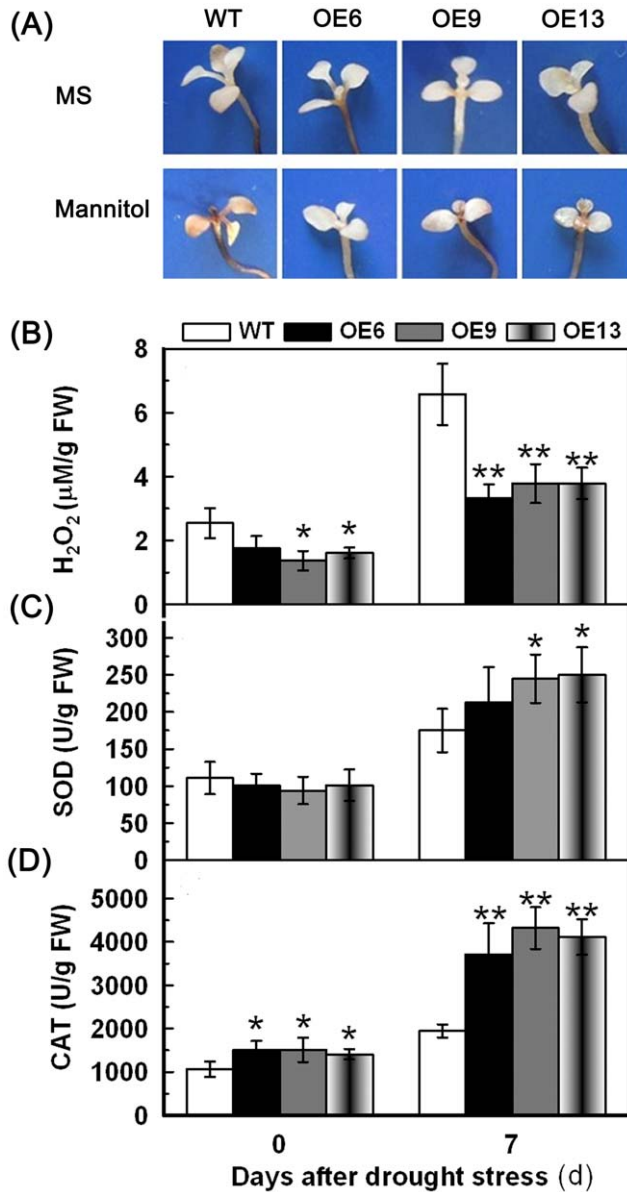

**Figure 8. Analysis of H<sub>2</sub>O<sub>2</sub> accumulation, SOD and CAT activities in transgenic lines under osmotic stress.** The WT and transgenic lines were cultured in MS medium under a 16 h light/8 h dark cycle at 25°C for one week, and then the seedlings were transplanted to MS or MS with 300 mM mannitol for one week. The whole seedlings were used to detect H<sub>2</sub>O<sub>2</sub> accumulation, SOD and CAT activities. (A) In situ detection of H<sub>2</sub>O<sub>2</sub> by DAB staining of WT and transgenic seedlings. (B) H<sub>2</sub>O<sub>2</sub> content. (C) SOD activity. (D) CAT activity. Vertical bars indicate  $\pm$ SD calculated from four replicates. Asterisks indicate significant difference between the WT and the three transgenic lines (\*p < 0.05; \*\*p < 0.01). Three biological experiments were performed, which produced similar results. doi:10.1371/journal.pone.0052439.g008

20% PEG6000 for 2 h and 6 h respectively. The plants were pretreated with 5 mM DMTU for 2 h and 6 h respectively, and then exposed to 100  $\mu$ M ABA for 2 h and 6 h respectively. The treatment of tungstate or DMTU alone was also performed in the experiment. In order to get reliable results, for all of the above treatments, the wheat seedlings of consistent growth were subjected to various treatments and the un-treated wheat seedlings were used as control for each series of treatments. For the organs

differential expression assays, roots, stems, and leaves were cut from sterile seedlings, and pistils, stamens and lemma were obtained from wheat plants in the field. The samples from treated or control plants were subsequently frozen in liquid nitrogen and stored at  $-80^{\circ}\text{C}$  for extraction of total RNA and qRT-PCR assay.

### Cloning and Bioinformatics Analysis of *TaAQP7* Gene

The wheat expressed sequence tags (ESTs) are available on the DFCI wheat gene index database (<http://compbio.dfc.harvard.edu/cgi-bin/tgi/gimain.pl?gudb=wheat>), from which an EST sequence (BE518349) belonging to major intrinsic protein (MIP) family was acquired. Sequence analysis by ORF Finder showed that the 3'-end was missing. Employing RACE reaction, the 3'-end of the gene from wheat was amplified with the SMART RACE cDNA amplification kit (Clontech) using the primer (P1, Table S1) and the cDNA obtained from leaves of wheat seedlings treated with 200 mM NaCl, 20% PEG6000, and cold ( $4^{\circ}\text{C}$ ) for 2 h as template. The amplified products of the 3' cDNA ends were inserted into the pMD18-T vector (TaKaRa). Nucleotide sequences of the inserted cDNA fragment was determined on an ABI PRISM310 Genetic Analyzer (Perkin Elmer Applied Biosystems, Foster City, CA, USA) using the BigDye Termination Cycle Sequencing Ready Reaction Kit (Perkin Elmer). The full-length cDNA sequence was identified with the help of DNAMAN software and was amplified by reverse transcriptase-polymerase chain reaction (RT-PCR) with the primer (P2, Table S1) and wheat Poly(A)<sup>+</sup> mRNA as template. The amplified product was inserted into the pMD18-T vector (TaKaRa). The nucleotide sequence was determined on an ABI PRISM310 Genetic Analyzer (Perkin Elmer) using the BigDye Termination Cycle Sequencing Ready Reaction Kit (Perkin Elmer). The sequence was analyzed by BLAST (<http://ncbi.nlm.nih.gov/blast>).

### qRT-PCR Analysis

The expression of *TaAQP7* in different wheat organs including leaves after different treatments was analyzed by qRT-PCR using the fluorescent intercalating dye SYBRGreen (ToYoBo, Japan) in a detection system (MJ research opticon2). Each 200 ng Poly(A)<sup>+</sup> mRNA was converted into cDNA using AMV Reverse Transcriptase (Promega) at  $42^{\circ}\text{C}$  in a final volume of 20  $\mu$ l, which subsequently served as the template in qRT-PCR. The primers (P3–P7, Table S1) used in the qRT-PCR excluded the highly conserved protein domain and had high efficiency and specificity, which was detected by Opticon monitor2 qRT-PCR software and agarose gel electrophoresis. The resulted PCR products by all the primers were subjected to sequence to confirm the specificity. In all of the experiments, appropriate negative controls containing no template RNA were subjected to the same procedure to exclude or detect any possible contamination. Before proceeding with the actual experiments, a series of template and primer dilutions were tested to determine the optimal template and primer concentration for maximum amplification of the target during the experiments. The amplification efficiencies for the internal control and the target genes were determined with the range from 0.9 to 1.1. Each sample was amplified in four independent replicates, and the data were analyzed using Opticon monitor 2 qRT-PCR software. *TaActin* or *NtUbiquitin* was used as the internal control for wheat and tobacco, respectively, that served as a benchmark to which other genes examined was normalized. The mRNA fold difference was relative to that of un-treated samples used as calibrator. The relative expression level of genes calculated using the  $2^{-\Delta\Delta\text{Ct}}$  formula [73].

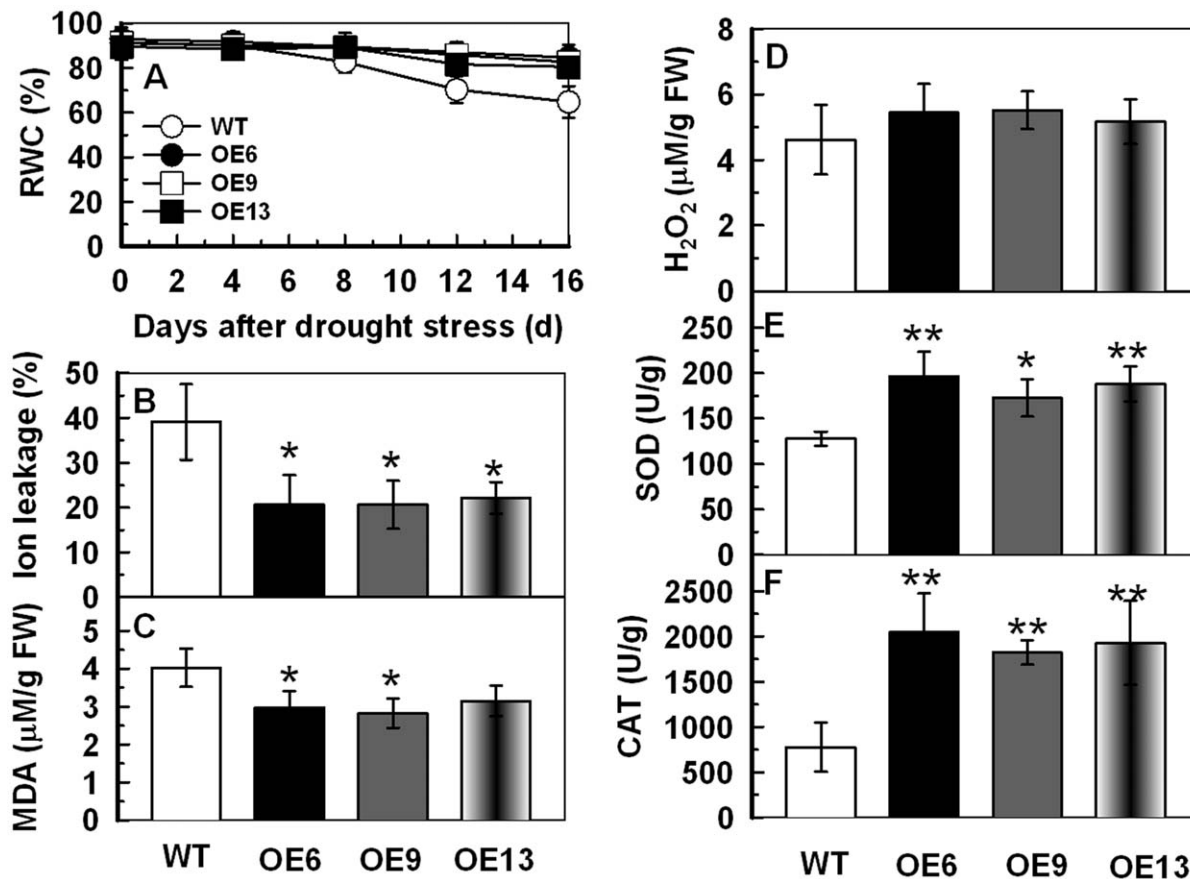

**Figure 9. The IL, MDA,  $\text{H}_2\text{O}_2$  content and the activities of SOD and CAT in WT and transgenic lines with the same water status under drought conditions.** The WT and transgenic lines were cultured in MS medium under a 16 h light/8 h dark cycle at 25°C for one week, and then the plants were transplanted to containers filled with a mixture of soil and sand (3:1) where they were regularly watered for two weeks. Three-week-old tobacco plants were deprived of water for 16 d. Tobacco leaves were sampled from WT and transgenic lines under drought stress to detect the RWC (A). When WT with 8 d drought treatment and transgenic lines with 16 d drought treatment, they maintained same water status and then the IL (B), MDA (C),  $\text{H}_2\text{O}_2$  (D), SOD (E) and CAT (F) were measured. doi:10.1371/journal.pone.0052439.g009

### Subcellular Localization of *TaAQP7* Protein

The coding sequence of *TaAQP7* containing an *NcoI/SpeI* restriction site was amplified by using primers (P8, Table S1) for transient expression in onion epidermal cells. The PCR products were subcloned into *NcoI/SpeI* sites of pCAMBIA1304-GFP expression vector under control of the CMV 35S promoter. The pCAMBIA1304-*TaAQP7*-GFP and the pm-rk were transiently expressed in onion epidermal cells using gene gun (PDS-1000, BIO-RAD), where pm-rk was used as the plasma membrane-localized marker [43]. Fluorescence was observed by confocal laser scanning microscopy (LSM700; Carl Zeiss) after incubation at 25°C for 24 h on MS medium. For the subcellular localization of *TaAQP7* in transgenic lines, root samples were sliced with razor blades and mounted between slides and cover slip in water. The fluorescence of the GFP fusion proteins was observed with confocal laser scanning microscopy.

### Complementary RNA Synthesis, Oocyte Preparation, cRNA Injection, and Osmotic Water Permeability Assay

The cDNA of *TaAQP7* were subcloned into pCS107 vector using the anking restriction sites *BamHI* and *EcoRI*. The cRNA transcripts were synthesized *in vitro* with mMESSAGE mMACHINE High Yield Capped RNA Transcription Kit (Ambion) with *AscI* linearized vector. Oocyte preparation, injection and

expression were performed as described by Daniels et al. (1996) [74]. The *Xenopus laevis* oocytes of stages VI were isolated and stored in ND96 solution (96 mM NaCl, 2 mM KCl, 1 mM  $\text{CaCl}_2$ , 1 mM  $\text{MgCl}_2$  and 5 mM Hepes, pH 7.4) containing 10  $\mu\text{g/ml}$  streptomycin. The follicular cell layer was removed via 2 h of incubation with 2 mg/ml of collagenase in ND96 buffer at 25°C with continuous gentle agitation. The defolliculated oocytes were injected with 50 nl of cRNA (1 mg/ml) or water using as negative control and then the oocytes were incubated at 18°C for 48 h in ND96 solution supplemented with 10  $\mu\text{g/ml}$  penicillin and 10  $\mu\text{g/ml}$  streptomycin. Osmotic water permeability coefficient of oocytes was determined as described by Zhang and Verkman (1991) [75]. To measure the osmotic water permeability coefficient, oocytes were transferred to five-fold diluted ND96 solution. Changes in the oocytes volume were monitored at room temperature with a microscope video system by taking digital images at 30s intervals. Oocytes volumes ( $V$ ) were calculated from the measured area of each oocyte. The osmotic Pf was calculated for the first 5 min using the formula  $\text{Pf} = V_0 [d(V/V_0)/dt] / [S_0 \times V_w (\text{Osm}_{in} - \text{Osm}_{out})]$ .  $V_0$  and  $S_0$  are the initial volume and surface area of each individual oocyte, respectively;  $d(V/V_0)/dt$ , the relative volume increase per unit time;  $V_w$ , the molar volume of water (18  $\text{cm}^3 \text{mol}^{-1}$ ); and  $\text{Osm}_{in} - \text{Osm}_{out}$ , the osmotic gradient between the inside and outside of the oocyte.

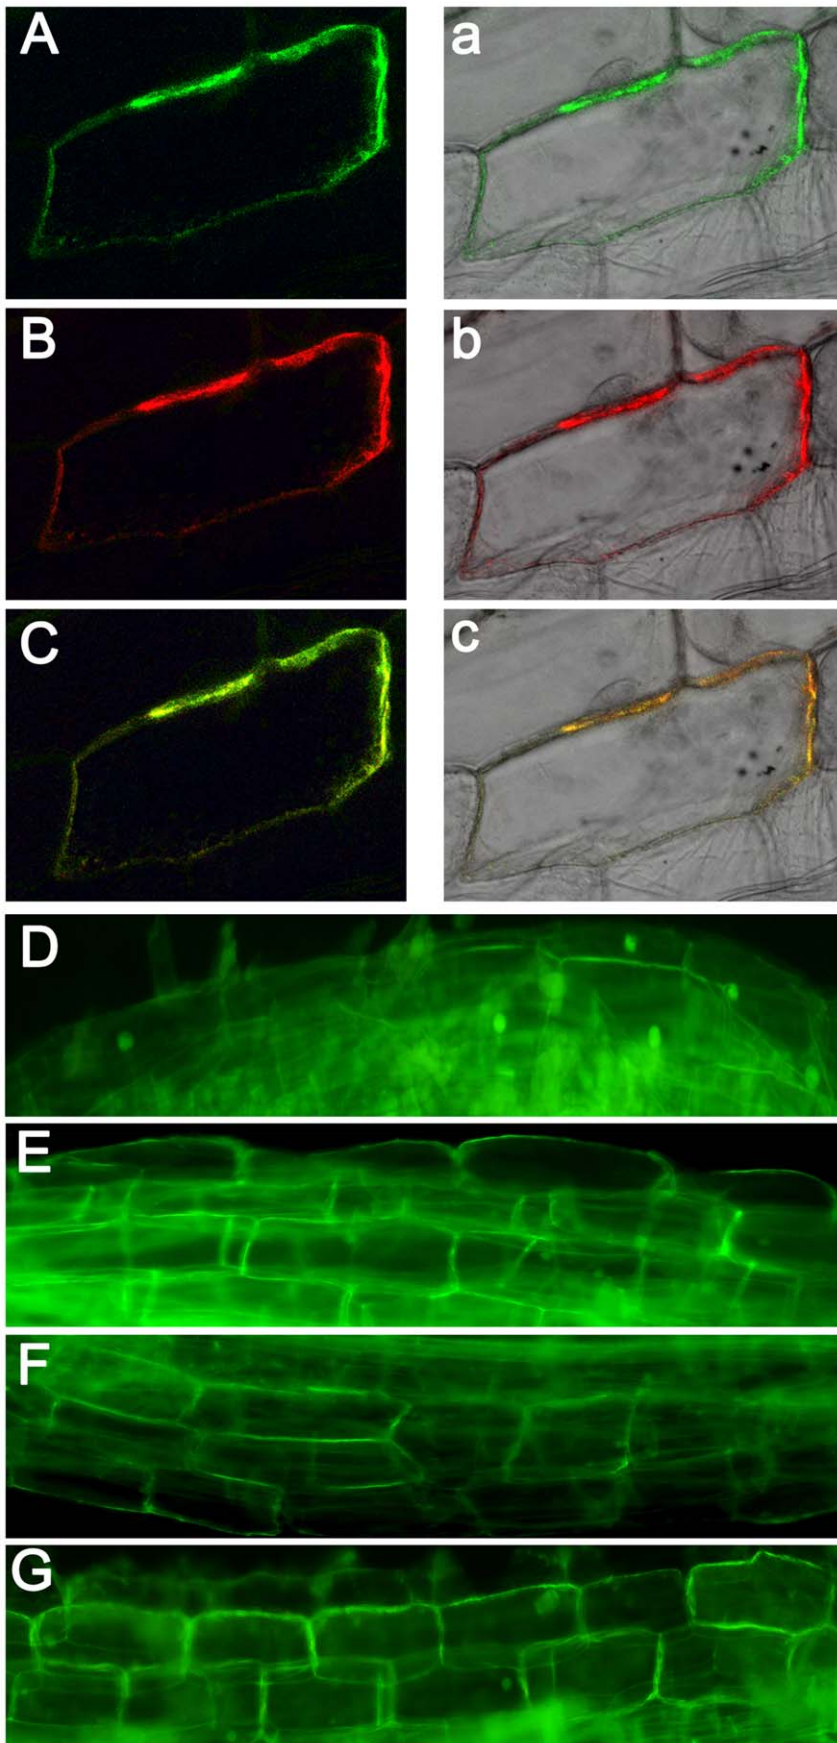

**Figure 10. Subcellular localization of TaAQP7 protein.** Onion epidermal cells transiently co-transformed with TaAQP7::GFP and pm-rk (Plasma membrane marker). (A, a) Fluorescence image of epidermal cell expressing the p35S-TaAQP7::GFP fusion protein. (B, b) Fluorescence image of epidermal cell expressing the pm-rk. (C, c) Merged fluorescence image of epidermal cell expressing the p35S-TaAQP7::GFP fusion protein and pm-rk marker. Images are dark field (A, B, C), bright field (a, b, c). Microscopy images of tobacco root cortical cells transformed with GFP alone as a control or TaAQP7. (D) Control; (E) OE6; (F) OE9; (G) OE13. Three biological experiments were performed, which produced similar results. doi:10.1371/journal.pone.0052439.g010

## Plant Transformation and Generation of Transgenic Plants

The recombinant plasmids pCAMBIA1304-TaAQP7-GFP was introduced into the *Agrobacterium tumefaciens* strain LBA4404. The transgenic tobaccos were generated using *Agrobacterium*-mediated transformation method [76]. The seeds from overexpression transgenic plants were selected on MS medium containing 40 mg/L of hygromycin. The hygromycin-resistant T<sub>1</sub> seedlings were confirmed by RT-PCR amplification using the primers for *TaAQP7* (P9, Table S1) and *GFP* (P10, Table S1) gene. Three independent transgenic T<sub>2</sub> line seedlings that almost all survived on MS medium containing 40 mg/L of hygromycin were used in the experiments. The expression of *TaAQP7* in the three independent T<sub>2</sub> lines was investigated by semi-quantitative RT-PCR analysis using primers P9 and P5 (Table S1), among which the *NiUbiquitin* gene was used as an internal control.

## Stress Tolerance Assays of the WT and the Transgenic Plants

WT, VC and transgenic lines were cultured in MS medium under a 16 h light/8 h dark cycle at 25°C for one week and then transplanted to containers filled with a mixture of soil and sand (3:1) where they were regularly watered for two weeks or five weeks for the drought stress tolerance assay. Plants with consistent growth state were subjected to withhold water for 20 d. After 20 d withholding water, photographs were taken. In the drought stress treatment, the leaves were collected from three-week-old plants to measure RWC, IL, MDA, H<sub>2</sub>O<sub>2</sub>, SOD and CAT at 15 and 30 d drought treatment respectively. In the mannitol treatment, the WT and transgenic lines were cultured in MS medium under a 16 h light/8 h dark cycle at 25°C for one week, and then the seedlings were transferred to MS or MS supplied with 150 or 300 mM mannitol for one week. The whole seedlings were used to perform physiological experiments, in which the root length, H<sub>2</sub>O<sub>2</sub> content, SOD and CAT activities were measured. A total of 200 surface-sterilized seeds of each transgenic line, VC or WT were sowed on MS without mannitol or MS supplied with 300 mM mannitol for 12 d to detect the germination rate.

## Measurement of RWC, MDA Content and IL

For the RWC assay in wheat, RWC was measured in control and dehydration-stressed 10-day-old seedlings. For dehydration stress, 10-day-old seedlings were placed onto dry filter paper within 12 h and the fresh weight (FW) of wheat leaves was immediately recorded. The leaves were soaked for 4 h in distilled water at room temperature under a constant light, and the turgid weight (TW) was recorded. After drying for 24 h at 80°C total dry weight (DW) was recorded. For the RWC assay in tobacco, three-week-old tobacco plants were deprived of water for 30 d. Tobacco leaves were sampled from WT and transgenic lines under drought stress for 15 d and 30 d to detect RWC. Fresh weight (FW) of plants was immediately recorded after leaf excision. The plants were soaked for 4 h in distilled water at room temperature under a constant light, and the turgid weight (TW) was recorded. After drying for 24 h at 80°C total dry weight (DW) was recorded. RWC was calculated as follows:  $RWC (\%) = [(FW - DW)/(TW - DW)] \times 100$  [77]. MDA content was determined by the

thiobarbituric acid (TBA)-based colorimetric method as described by Heath and Packer [78]. IL was measured based on the method of Jiang and Zhang [35] with slight modification. The collected leaves were cut into strips and incubated in 10 ml of distilled water at room temperature for 12 h. The initial conductivity (C1) was measured with a conductivity meter (DDBJ-350, Shanghai, China). The samples were then boiled for 30 min to result in complete ion leakage. After cooling down at room temperature, the electrolyte conductivity (C2) was measured. Electrolyte leakage (C) was calculated according to the equation  $C (\%) = C1/C2 \times 100$ .

## Measurement of SOD, CAT and POD Activities and H<sub>2</sub>O<sub>2</sub> Content

The activities of three antioxidant enzymes, CAT, POD, and SOD were measured by spectrophotometer. In the SOD, POD and CAT activities measurement, each sample (0.5 g) was ground in liquid and homogenized in 5 ml of extraction buffer containing 0.05 M phosphate buffer (pH 7.8) and 1% polyvinylpyrrolidone. The homogenate was centrifuged at 10000 g for 10 min at 4°C and the resulting supernatant was collected for enzyme activity analysis. SOD and CAT activities were spectrophotometrically measured by using SOD and CAT Detection Kit (A001 and A007, Jiancheng, Nanjing, China) according to the manufacturer's instruction. Total POD activity was measured by the change in absorbance of 470 nm due to guaiacol oxidation according to the method described in previous study [79]. Samples were collected for H<sub>2</sub>O<sub>2</sub> measurements as described in previous study [35].

## Histochemical Detection of H<sub>2</sub>O<sub>2</sub>

H<sub>2</sub>O<sub>2</sub> accumulation was detected by the DAB staining methods [80]. The seedlings infiltrated with 5 mg/ml DAB at pH 3.8 for 20 h to detect H<sub>2</sub>O<sub>2</sub>. Then the seedlings were decolorized by boiling in ethanol (96%) for 10 min. After cooling, the seedlings were extracted at room temperature with fresh ethanol and photographed.

## Supporting Information

**Figure S1 Comparison of TaAQP7 with other known PIP proteins.** Amino acid sequences are aligned by ClusterX software. Six transmembrane-helix (H1–H6) are shown in the box. Letters marked with double transverse lines refer to the most highly conserved amino acid sequences of MIP. Letters marked with black dot represent the 'NPA' motif. The accession numbers of these known proteins in GenBank are as follows: HvPIP2;1 (BAA23744.1), ZmPIP2;2 (ACG33001.1), ZmPIP1;1 (AAO86706.1) and HvPIP1;1 (BAF41978.1). The accession numbers of these known proteins in GenBank are given in parentheses. (TIF)

**Figure S2 Phylogenetic relationships of TaAQP7 (boxed) with other known AQPs.** The unrooted tree was constructed using full-length amino acid sequences and summarized the phylogenetic relationship among the members of AQP family in wheat, Arabidopsis and rice. Tree was made using ClustalX 1.83 and MEGA 4.0. (TIF)

**Figure S3 Expression analysis of *TaAQP7* in different organs in wheat by qRT-PCR.** R: root; S: stem; L: leaf; ST: stamen; P: pistil; LE: lemma. The y-axis represents the relative fold difference in mRNA level calculated using the  $2^{-\Delta\Delta C_t}$  formula with *TaActin* as internal control. The mRNA fold difference was relative to that of leaf samples used as calibrator. Vertical bars indicate  $\pm$ SE of four replicates on one sample. When no bar is shown, the deviation is smaller than the symbol. Three biological experiments were performed, which produced similar results. (TIF)

**Figure S4 Expression profiles of *TaAQP7* under MeJA, SA and auxin treatments in wheat.** Ten-day-old wheat seedlings were treated with 100  $\mu$ M MeJA (A), 2 mM SA (B), and 50  $\mu$ M auxin (C) and leaves were sampled within 24 h to extract RNA for qRT-PCR analysis. The y-axis represents the relative fold difference in mRNA level calculated using the  $2^{-\Delta\Delta C_t}$  formula with *TaActin* as internal control. The mRNA fold difference is relative to that of distilled water treated samples used as calibrator. Vertical bars indicate  $\pm$ SE of four replicates on one sample. When no bar is shown, the deviation is smaller than the symbol. Three biological experiments were performed, which produced similar results. (TIF)

**Video S1 The oocytes swelling in *TaAQP7*-expressing oocytes.** The defolliculated oocytes were injected with 50 nl of cRNA (1 mg/ml) or water using as negative control and then the

oocytes were incubated at 18°C for 48 h in ND96 solution supplemented with 10  $\mu$ g/ml penicillin and 10  $\mu$ g/ml streptomycin. The oocytes were transferred to five-fold diluted ND96 solution, and then the oocytes volume were monitored at room temperature with a microscope video system by taking digital images at 30s intervals. The upper (yellow) is the control and the lower (blue) is the oocytes injected with cRNA of *TaAQP7*. Three biological experiments were performed, which produced similar results.

(MOV)

**Table S1 Primers used for PCR analysis.** (DOC)

## Acknowledgments

We thank Analytical and Testing Center of Huazhong University of Science and Technology (HUST) for supplying the MJ Research Opticon2 qRT-PCR Machine. We also thank Professor Qinghua Tao and Master Hao Lin from School of Life Sciences, Tsinghua University for helping us finish the expression of *TaAQP7* in *Xenopus laevis* oocytes.

## Author Contributions

Conceived and designed the experiments: SZ WH XD CW. Performed the experiments: SZ WH JW YH LC. Analyzed the data: SZ WH ZM. Contributed reagents/materials/analysis tools: CH. Wrote the paper: SZ WH. Provided guidance on the whole study: GY GH.

## References

- Suga S, Komatsu S, Maeshima M (2002) Aquaporin isoforms responsive to salt and water stresses and phytohormones in radish seedlings. *Plant Cell Physiol* 43: 1229–1237.
- Lian HL, Xin Y, Ye Q, Ding XD, Kitagawa Y, et al. (2004) The role of aquaporin RWC3 in drought avoidance in rice. *Plant Cell Physiol* 45: 481–489.
- Vera-Estrella R, Barkla BJ, Bohnert HJ, Pantoja O (2004) Novel regulation of aquaporins during osmotic stress. *Plant Physiol* 135: 2318–2329.
- Sade N, Gebretsadik M, Seligmann R, Schwartz A, Wallach R, et al. (2010) The role of tobacco Aquaporin1 in improving water use efficiency, hydraulic conductivity, and yield production under salt stress. *Plant Physiol* 152: 245–254.
- Johanson I, Gustavsson S, Jovall S, Frayssé F (2001) The complete set of genes encoding major intrinsic proteins in Arabidopsis provides a framework for a new nomenclature for major intrinsic proteins in plants. *Plant Physiol* 126: 1358–1369.
- Chaumont F, Barrieu F, Wojcik E, Chrispeels MJ, Jung R (2001) Aquaporins constitute a large and highly divergent protein family in maize. *Plant Physiol* 12: 1206–1215.
- Sakurai J, Ishikawa F, Yamaguchi T, Uemura M, Maeshima M (2005) Identification of 33 rice aquaporin genes and analysis of their expression and function. *Plant Cell Physiol* 46: 1568–1577.
- Aroca R, Amodeo G, Fernández-Illescas S, Herman EM, Chaumont F, et al. (2004) The role of aquaporins and membrane damage in chilling and hydrogen peroxide induced changes in the hydraulic conductance of maize roots. *Plant Physiol* 137: 341–353.
- Guo L, Wang ZY, Lin H, Cui WE, Chen J, et al. (2006) Expression and functional analysis of the rice plasma-membrane intrinsic protein gene family. *Cell Res* 16: 277–286.
- Yu X, Peng YH, Zhang MH, Shao YJ, Su WA, et al. (2006) Water relations and an expression analysis of plasma membrane intrinsic proteins in sensitive and tolerant rice during chilling and recovery. *Cell Res* 16: 599–608.
- Cui XH, Hao FS, Chen H, Chen J, Wang XC (2008) Expression of the *Vicia faba* *VjPIP1* gene in *Arabidopsis thaliana* plants improves their drought resistance. *J Plant Res* 121: 207–214.
- Mahdih M, Mostajeran A, Horie T, Katsuhara M (2008) Drought stress alters water relations and expression of PIP-type aquaporin genes in *Nicotiana tabacum* plants. *Plant Cell Physiol* 49: 801–813.
- Peng YH, Arora R, Li GW, Wang X, Fesschaie A (2008) Rhododendron catawbiense plasma membrane intrinsic proteins are aquaporins and their overexpression compromises constitutive freezing tolerance and cold acclimation ability of transgenic Arabidopsis plants. *Plant Cell Environ* 31: 1275–1289.
- Gao ZX, He XL, Zhao BC, Zhou CJ, Liang YZ, et al. (2010) Overexpressing a putative aquaporin gene from wheat, *TaNIP*, enhances salt tolerance in transgenic Arabidopsis. *Plant Cell Physiol* 51: 767–775.
- Johansson I, Karlsson M, Johanson U, Larsson C, Kjellbom P (2000) The role of aquaporins in cellular and whole plant water balance. *Biochim Biophys Acta* 1465: 324–342.
- North GB, Nobel PS (2000) Heterogeneity in water availability alters cellular development and hydraulic conductivity along roots of a desert succulent. *Ann Bot* 85: 247–255.
- Aroca R, Amodeo G, Fernandez-Illescas S, Herman EM, et al. (2005) The Role of Aquaporins and Membrane Damage in Chilling and Hydrogen Peroxide Induced Changes in the Hydraulic Conductance of Maize Roots. *Plant Physiol* 137: 341–353.
- Horie T, Kaneko T, Sugimoto G, Sasano S, Panda SK, et al. (2011) Mechanisms of water transport mediated by PIP aquaporins and their regulation via phosphorylation events under salinity stress in barley roots. *Plant Cell Physiol* 52: 663–675.
- Bienert GP, Schjoerring JK, Jahn TP (2006) Membrane transport of hydrogen peroxide. *Biochim Biophys Acta* 1758: 994–1003.
- Quintero JM, Fournier JM, Benloch M (1999) Water transport in sunower root systems: effects of ABA,  $Ca^{2+}$  status and  $HgCl_2$ . *J Exp Bot* 50: 1607–1612.
- Hose E, Steudle E, Hartung W (2000) Abscisic acid and hydraulic conductivity of maize roots: a study using cell- and root-pressure probes. *Planta* 211: 874–882.
- Dynowski M, Schaaf G, Loque D, Moran O, Ludewig U (2008) Plant plasma membrane water channels conduct the signaling molecule  $H_2O_2$ . *Biochem J* 414: 53–61.
- Boursiac Y, Boudet J, Postaire O, Luu DT, Tournaire-Roux C, et al. (2008) Stimulus-induced downregulation of root water transport involves reactive oxygen species-activated cell signalling and plasma membrane intrinsic protein internalization. *Plant J* 56: 207–218.
- Boursiac Y, Prak S, Boudet J, Postaire O, Luu DT, et al. (2008) The response of Arabidopsis root water transport to a challenging environment implicates reactive oxygen species- and phosphorylation-dependent internalization of aquaporins. *Plant Signal Behav* 3: 1096–1098.
- Heinen RB, Ye Q, Chaumont F (2009) Role of aquaporins in leaf physiology. *J Exp Bot* 60: 2971–2985.
- Ehlert C, Maurel C, Tardieu F, Simonneau T (2009) Aquaporin-mediated reduction in maize root hydraulic conductivity impacts cell turgor and leaf elongation even without changing transpiration. *Plant Physiol* 150: 1093–1104.
- Li DD, Wu YJ, Ruan XM, Li B, Zhu L, et al. (2009) Expressions of three cotton genes encoding the PIP proteins are regulated in root development and in response to stresses. *Plant Cell Rep* 28: 291–300.
- Flower DJ, Ludlow MM (1986) Contribution of osmotic adjustment to the dehydration tolerance of water-stressed pigeon pea (*Cajanus cajan* (L.) millsp.) leaves. *Plant Cell Environ* 9: 33–40.



29. Rampino P, Pataleo S, Gerardi C, Mita G, Perrotta C (2006) Drought stress response in wheat: physiological and molecular analysis of resistant and sensitive genotypes. *Plant Cell Environ* 29: 2143–2152.
30. Jiang MY, Zhang JH (2002) Water stress-induced abscisic acid accumulation triggers the increased generation of reactive oxygen species and up-regulates the activities of antioxidant enzymes in maize leaves. *J Exp Bot* 53: 2401–2410.
31. Zhang AY, Jiang MY, Zhang JH, Tan MP, Hu XL (2006) Mitogen activated protein kinase is involved in abscisic acid-induced antioxidant defense and acts downstream of reactive oxygen species production in leaves of maize plants. *Plant Physiol* 141: 475–487.
32. Mittler R, Herr EH, Orvar BL, van Camp W, Willekens H, et al. (1999) Transgenic tobacco plants with reduced capability to detoxify reactive oxygen intermediates are hyperresponsive to pathogen infection. *Proc Natl Acad Sci U S A* 96: 14165–14170.
33. Guan LM, Zhao J, Scandalios JG (2000) Cis-elements and trans-factors that regulate expression of the maize *Cat1* antioxidant gene in response to ABA and osmotic stress: H<sub>2</sub>O<sub>2</sub> is the likely intermediary signaling molecule for the response. *Plant J* 22: 87–95.
34. Pei ZM, Murata Y, Benning G, Thomine S, Klüsener B, et al. (2000) Calcium channels activated by hydrogen peroxide mediate abscisic acid signaling in guard cells. *Nature* 406: 731–734.
35. Jiang M, Zhang J (2001) Effect of abscisic acid on active oxygen species, antioxidative defence system and oxidative damage in leaves of maize seedlings. *Plant Cell Physiol* 42: 1265–1273.
36. Lin CC, Kao CH (2001) Abscisic acid induced changes in cell wall peroxidase activity and hydrogen peroxide level in roots of rice seedlings. *Plant Sci* 160: 323–329.
37. Kwak JM, Mori IC, Pei ZM, Leonhardt N, Torres MA, et al. (2003) NADPH oxidase *AtbohD* and *AtbohF* genes function in ROS-dependent ABA signaling in *Arabidopsis*. *EMBO J* 22: 2623–2633.
38. Kuo TH, Kao CH (2004) Hydrogen peroxide is necessary for abscisic acid-induced senescence of rice leaves. *J Plant Physiol* 161: 1347–1357.
39. Laloï C, Mestres-Ortega D, Marco Y, Meyer Y, Reichheld JP (2004) The *Arabidopsis* cytosolic *h5* gene induction by oxidative stress and its w-box-mediated response to pathogen elicitor. *Plant Physiol* 134: 1006–1016.
40. Hu X, Jiang M, Zhang A, Lu J (2005) Abscisic acid-induced apoplastic H<sub>2</sub>O<sub>2</sub> accumulation up-regulates the activities of chloroplastic and cytosolic antioxidant enzymes in maize leaves. *Planta* 223: 57–68.
41. Moore K, Roberts LJ (1998) Measurement of lipid peroxidation. *Free Radic Res* 28: 659–671.
42. Hanson MR, Kohler RH (2001) GFP imaging: methodology and application to investigate cellular compartmentation in plants. *J Exp Bot* 356: 529–538.
43. Nelson BK, Cai X, Nebenführ A (2007) A multicolored set of in vivo organelle markers for co-localization studies in *Arabidopsis* and other plants. *Plant J* 51: 1126–1136.
44. Forrest K, Bhavé M (2008) The PIP and TIP aquaporins in wheat form a large and diverse family with unique gene structures and functionally important features. *Funct Integr Genom* 8: 115–133.
45. Ayadi M, Cavez D, Miled N, Chaumont F, Masmoudi K (2011) Identification and characterization of two plasma membrane aquaporins in durum wheat (*Triticum turgidum* L. subsp. durum) and their role in abiotic stress tolerance. *Plant Physiol Biochem* 49: 1029–1039.
46. Jang JY, Kim DG, Kim YO, Kim JS, Kang H (2004) An expression analysis of a gene family encoding plasma membrane aquaporins in response to abiotic stresses in *Arabidopsis thaliana*. *Plant Mol Biol* 54: 713–725.
47. Alexandersson E, Frayssé L, Sjøvall-Larsen S, Gustavsson S, Fellert M, et al. (2005) Whole gene family expression and drought stress regulation of aquaporins. *Plant Mol Biol* 59: 469–484.
48. Lian HL, Yu X, Lane D, Sun WN, Tang ZC, et al. (2006) Upland rice and lowland rice exhibited different *PIP* expression under water deficit and ABA treatment. *Cell Res* 16: 651–660.
49. Wei H, Dhanaraj AL, Arora R, Rowland LJ, Fu Y, et al. (2006) Identification of cold acclimation-responsive *Rhododendron* genes for lipid metabolism, membrane transport and lignin biosynthesis: importance of moderately abundant ESTs in genomic studies. *Plant Cell Environ* 29: 558–570.
50. Kaldenhoff R, Kölling A, Richter G (1993) A novel blue light- and abscisic acid-inducible gene of *Arabidopsis thaliana* encoding an intrinsic membrane protein. *Plant Mol Biol* 23: 1187–1198.
51. Weig A, Deswarte C, Chrispeels MJ (1997) The major intrinsic protein family of *Arabidopsis* has 23 members that form three distinct groups with functional aquaporins in each group. *Plant Physiol* 114: 1347–1357.
52. Mariaux JB, Bockel C, Salamini F, Bartels D (1998) Desiccation- and abscisic acid-responsive genes encoding major intrinsic proteins (MIPs) from the resurrection plant *Crateogeomys plantagineum*. *Plant Mol Biol* 38: 1089–1099.
53. Siefritz F, Biela A, Eckert M, Otto B, Uehlein N, et al. (2001) The tobacco plasma membrane aquaporin *NtAQP1*. *J Exp Bot* 52: 1953–1957.
54. Wan X, Steudle E, Hartung W (2004) Gating of water channels (aquaporins) in cortical cells of young corn roots by mechanical stimuli (pressure pulses): effects of ABA and of HgCl<sub>2</sub>. *J Exp Bot* 55: 411–422.
55. Lee SH, Singh AP, Chung GC (2004) Rapid accumulation of hydrogen peroxide in cucumber roots due to exposure to low temperature appears to mediate decreases in water transport. *J Exp Bot* 55: 1733–1741.
56. Ye Q, Holbrook NM, Zwieniecki MA (2008) Cell-to-cell pathway dominates xylem-epidermis hydraulic connection in *Tradescantia uncinata* (Vell. Conc.) leaves. *Planta* 227: 1311–1319.
57. Kim YX, Steudle E (2009) Gating of aquaporins by light and reactive oxygen species in leaf parenchyma cells of the midrib of *Zea mays*. *J Exp Bot* 60: 547–556.
58. Zhang J, Deng Z, Cao S, Wang X, Zhang A, et al. (2008) Isolation of six novel aquaporin genes from *Triticum aestivum* L. and functional analysis of *TaAQP6* in water redistribution. *Plant Mol Biol Rep* 26: 32–45.
59. Li GW, Zhang MH, Cai WM, Sun WN, Su WA (2008) Characterization of OsPIP2;7, a water channel protein in rice. *Plant Cell Physiol* 49: 1851–1858.
60. Aharon R, Shahak Y, Winger R, Bendov R, Kapulnik Y, et al. (2003). Overexpression of a plasma membrane aquaporin in transgenic tobacco improves plant vigor under favorable growth conditions but not under drought or salt stress. *The Plant Cell* 15: 439–447.
61. Maurel C (1997) Aquaporins and water permeability of plant membranes. *Annu Rev Plant Physiol Plant Mol Biol* 48: 399–429.
62. Zhao CX, Shao HB, Chu LY (2008) Aquaporin structure-function relationships: water flow through plant living cells. *Colloids Surf B Biointerfaces* 62: 163–172.
63. Hanba YT, Shibasaki M, Hayashi Y, Hayakawa T, Kasamo K, et al. (2004) Overexpression of the barley aquaporin *HaPIP2;1* increases internal CO<sub>2</sub> conductance and CO<sub>2</sub> assimilation in the leaves of transgenic rice plants. *Plant Cell Physiol* 45: 521–529.
64. Polle A (2001) Dissection the superoxide dismutase-ascorbate-glutathione pathway by metabolic modeling: computer analysis as a step towards flux analysis. *Plant Physiol* 126: 445–462.
65. Mittler R, Vanderauwera S, Gollery M, Van Breusegem F (2004) Reactive oxygen gene network of plants. *Trends Plant Sci* 9: 490–498.
66. Zhang Y, Wang Z, Chai T, Wen Z, Zhang H (2008) Indian mustard aquaporin improves drought and heavy-metal resistance in tobacco. *Mol Biotechnol* 40: 280–292.
67. Kourie JI (1998) Interaction of reactive oxygen species with ion transport mechanisms. *Am J Physiol* 275: C1–C24.
68. Choudhary SP, Yu JQ, Yamaguchi-Shinozaki K, Shinozaki K, Tran LS (2012) Benefits of brassinosteroid crosstalk. *Trends Plant Sci* 17: 594–600.
69. Benabdellah K, Ruiz-Lozano JM, Aroca R (2009) Hydrogen peroxide effects on root hydraulic properties and plasma membrane aquaporin regulation in *Phaseolus vulgaris*. *Plant Mol Biol* 70: 647–661.
70. Miller G, Suzuki N, Ciftci-Yilmaz S, Mittler R (2010) Reactive oxygen species homeostasis and signalling during drought and salinity stresses. *Plant Cell Environ* 33: 453–467.
71. Jaleel CA, Riadh K, Gopi R, Manivannan P, Inès J, et al. (2009) Antioxidant defense responses: physiological plasticity in higher plants under abiotic constraints. *Acta Physiol Plant* 31: 427–436.
72. Huang XS, Liu JH, Chen XJ (2010) Overexpression of *PtRABF* gene, a bZIP transcription factor isolated from *Poncirus trifoliata*, enhances dehydration and drought tolerance in tobacco via scavenging ROS and modulating expression of stress-responsive genes. *BMC Plant Biol* 10: 230.
73. Livak KJ, Schmittgen TD (2001) Analysis of relative gene expression data using real-time Quantitative PCR and the 2<sup>-ΔΔC<sub>t</sub></sup> method. *Methods* 25: 402–408.
74. Daniels MJ, Chaumont F, Mirkov TE, Chrispeels MJ (1996) Characterization of a new vacuolar membrane aquaporin sensitive to mercury at a unique site. *Plant Cell* 8: 587–599.
75. Zhang RB, Verkman AS (1991) Water and urea permeability properties of *Xenopus* oocytes: expression of mRNA from toad urinary bladder. *Am J Physiol* 260: C26–C34.
76. Horsch RB, Fry JE, Hoffmann NL, Eichholtz D, Rogers SC, et al. (1985) A simple and general method for transferring genes into plants. *Science* 227: 1229–1231.
77. Barrs HD, Weatherley PE (1962) A reexamination of the relative turgidity technique for estimating water deficit in leaves. *Aust J Biol Sci* 15: 413–428.
78. Heath RL, Packer L (1968) Photoperoxidation in isolated chloroplasts. I. Kinetics and stoichiometry of fatty acid peroxidation. *Arch Biochem Biophys* 125: 189–198.
79. Polle A, Otter T, Seifert F (1994) Apoplastic peroxidases and lignification in needles of norway spruce (*Picea abies* L.). *Plant Physiol* 106: 53–60.
80. Pan J, Zhang M, Kong X, Xing X, Liu Y, et al. (2012) *ZmMPK17*, a novel maize group D MAP kinase gene, is involved in multiple stress responses. *Planta* 235: 661–676.
